# Supplementary material
Source: publisher figshare collection journal article supplement (https://acs.figshare.com/ndownloader/files/4615711)
Supplement: Supplementary file 1 [file 4615711]

# Enzyme-modified field effect transistors based on surface-conductive single crystalline diamond

*Andreas Härtl, Barbara Baur, Martin Stutzmann, and Jose A. Garrido\**

Walter Schottky Institut, Technische Universität München, Garching, Germany

## Supplementary Information

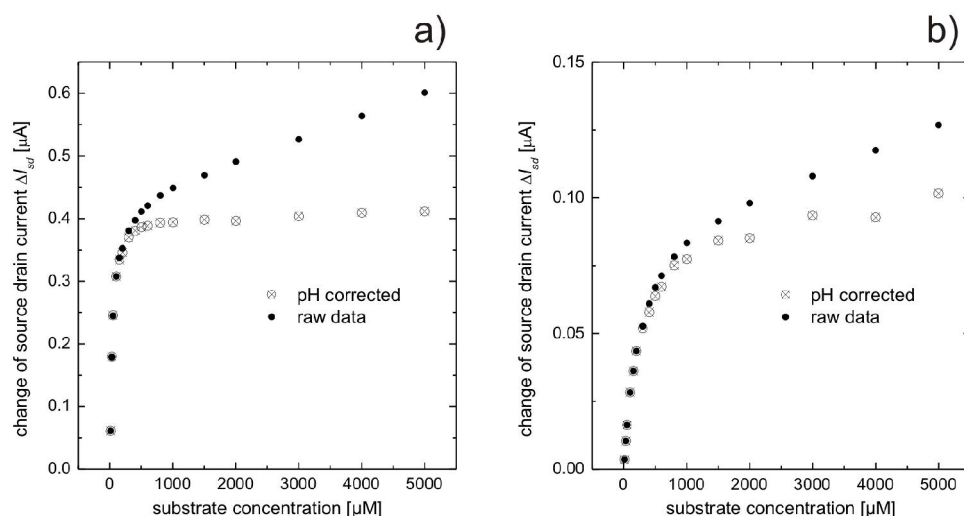

Variation of the source-drain-current  $I_{sd}$  as a function of acetylcholine chloride. The graphs compare the raw data and pH corrected data for the AchE-EnFET in the case of standard and diluted (1:10) buffer solutions, right and left graphs, respectively. The pH correction mainly affects the saturation region in the case of measurements using a diluted buffer.
